# Supplementary material
Source: PubMed Central journal article supplement (PMC2859072)
Supplement: NIHMS179758-supplement-01.pdf [file NIHMS179758-supplement-01.pdf]

**SUPPLEMENTARY INFORMATION**

**Structure of a Blm10 complex reveals common mechanisms for proteasome binding and gate opening**

Kianoush Sadre-Bazzaz, Frank G. Whitby, Howard Robinson, Tim Formosa, Christopher P. Hill

**Figure S1, related to Figure 1**

A number of observations argue that the crystal structure is not unduly influenced by lattice contacts. First, the four Blm10 complexes in the asymmetric unit are closely similar to each other and to reconstructions by electron cryomicroscopy (Iwanczyk et al., 2006; Ortega et al., 2005). Second, conserved residues mediate stabilizing contacts between Blm10 segments that are distant in amino acid sequence (panel A). Third, Blm10 wraps around the end of the proteasome barrel to contact all seven proteasome  $\alpha$ -subunits in an interface that buries more than 10,000  $\text{\AA}^2$  of solvent accessible surface area (Figure 1E) and largely defines the Blm10 conformation. Fourth, a cluster of conserved residues from HR6 to HR9 and from HR30 to beyond HR32, contact each other and residues near the N-terminus of proteasome subunits  $\alpha 5$  and  $\alpha 6$  (panels B-D) to help define the pore conformation and define the relative orientations of the upper and lower turns of the Blm10 solenoid. Fifth, the 3.4 $\text{\AA}$  crystal structure described here of the complex with Blm10 lacking the first 50 residues appears identical to the crystal structures of full-length Blm10 complexes with proteasome observed in two different crystal forms at lower (4.0 $\text{\AA}$  and 4.4 $\text{\AA}$ ) resolution (data not shown).

(A) Blm10 (white) with selected linker segments that stabilize the structure (color). The close-up views illustrate the role of conserved residues (underlined, panel E) that make stabilizing interactions. (B) Proteasome  $\alpha 5$  and  $\alpha 6$  N-terminal residues (black) are extended and make extensive contacts with Blm10, including residues that are conserved and also stabilize the relative orientation of the two tiers of the Blm10 solenoid.

(C) Stereoview showing details of  $\alpha 5$  N-terminal residues and their contacts. Conserved residues are underlined.

(D) Same as panel D, but for  $\alpha 6$  contacts.

(E) *S. cerevisiae* Blm10 sequence. Secondary structures (above) colored as in Figure 1. HEAT repeat helices are labeled 1A for helix A of HEAT repeat 1, etc. Residues disordered in the structure are indicated with a dashed line. Residues that approach the proteasome within 4.0  $\text{\AA}$  are marked with a square below; contact to  $\alpha 1$  blue,  $\alpha 2$  cyan,  $\alpha 3$  green,  $\alpha 4$  magenta,  $\alpha 5$  orange,  $\alpha 6$  red,  $\alpha 7$  gray. Residues identical in *S. cerevisiae* Blm10 and human PA200 are underlined. Blm10 residues conserved in an alignment of 46 related sequences are shown on a yellow background. Conservation is defined according to the ESPript consensus (Gouet et al., 1999) from the automatic alignment, with a

few residues also defined as conserved because simple manual adjustment of gaps aligns residues that appear to be structurally important.

Proteasome residues have been highly conserved throughout evolution, especially on the  $\alpha$ -subunit surface, with 82/112 (73%) of the proteasome residues that contact Blm10 being identical in *S. cerevisiae* and human. In contrast, the Blm10 sequence is much more divergent, with only 162/2143 (8%) of the residues conserved in the alignment indicated here. The conservation is somewhat higher at the proteasome interface, especially for residues that contact proteasome  $\alpha$ 5 and  $\alpha$ 6 subunits, where 17/62 (27%) of Blm10 residues contacting these subunits are conserved.

A

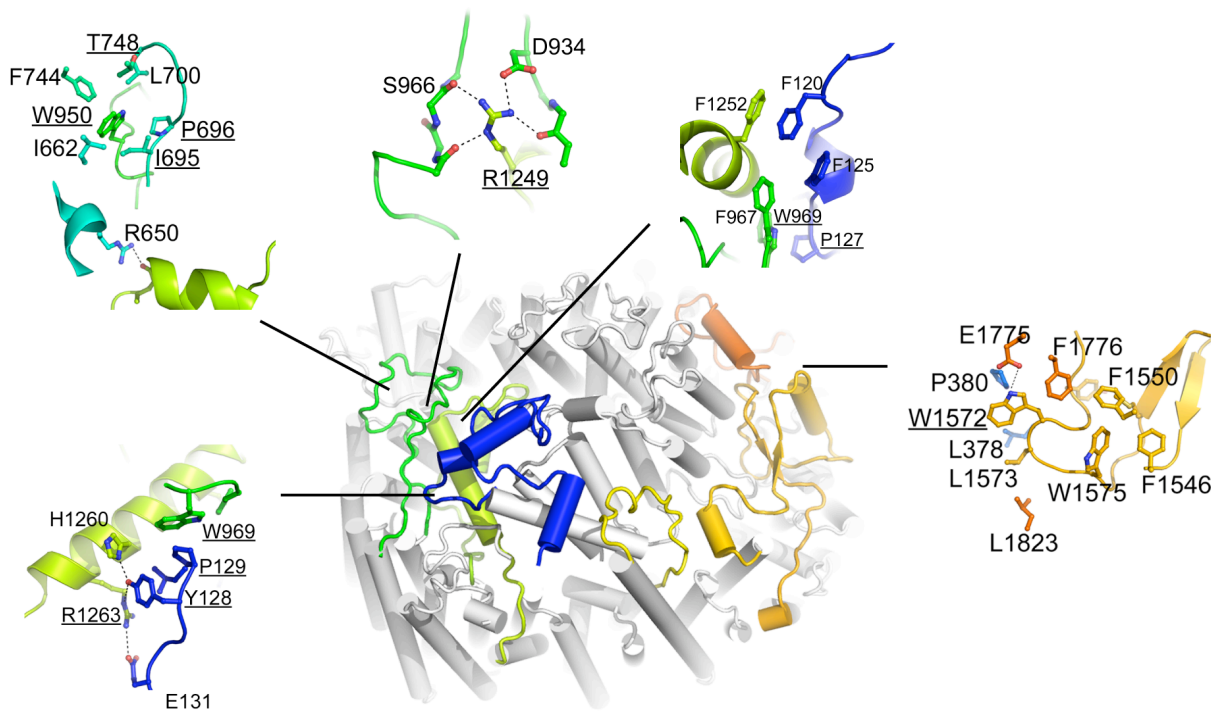

B

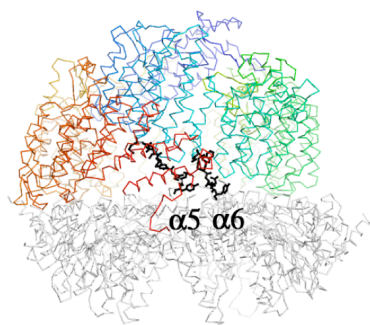

C

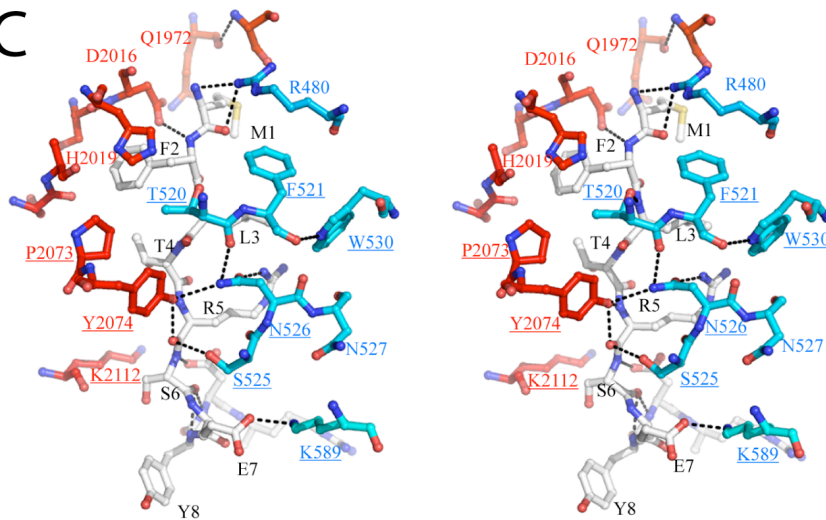

D

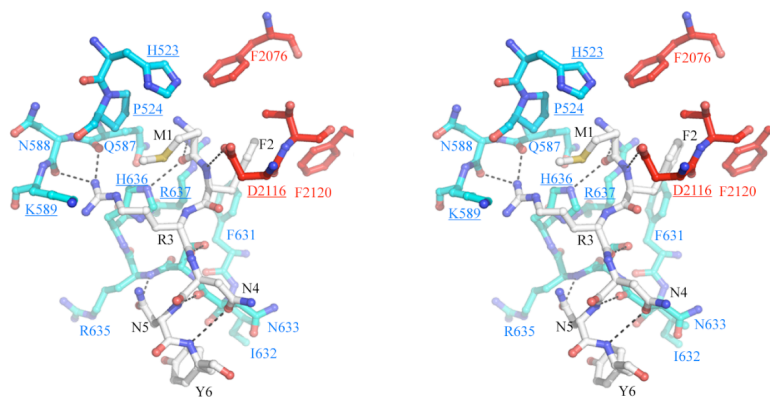

E

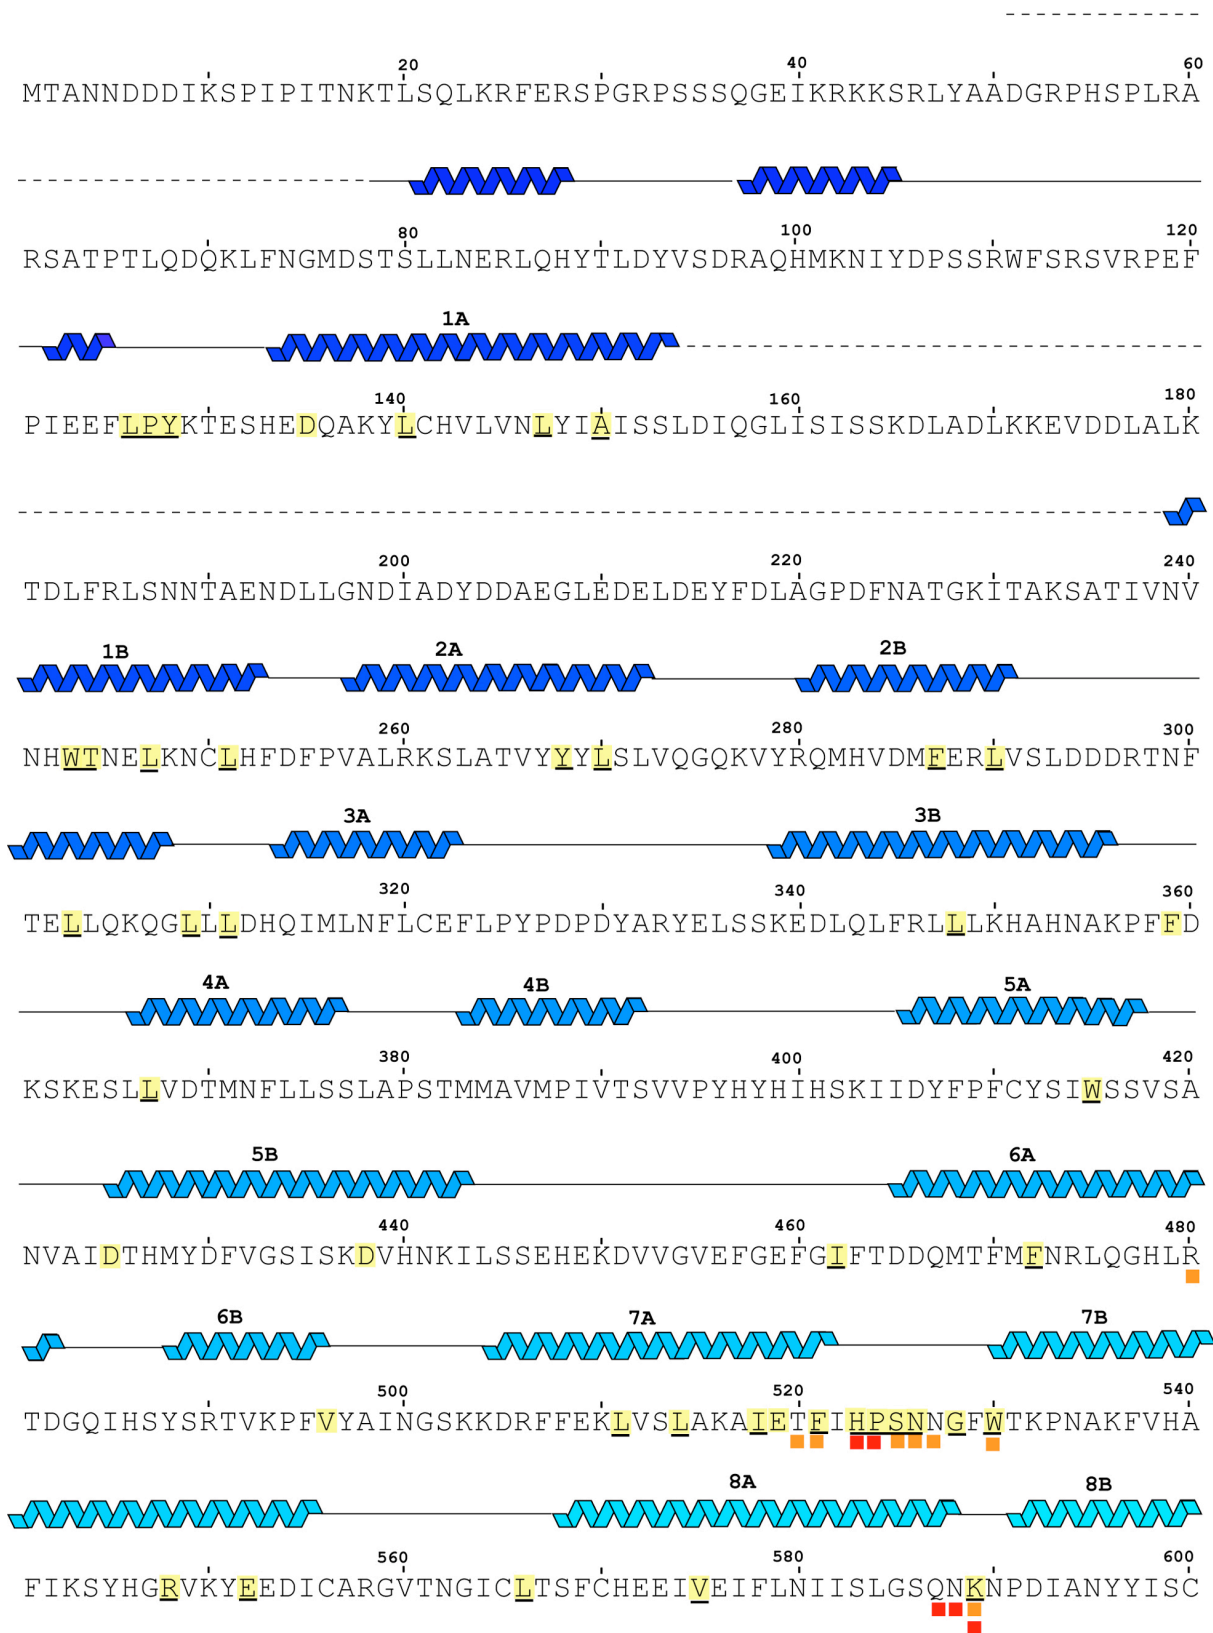

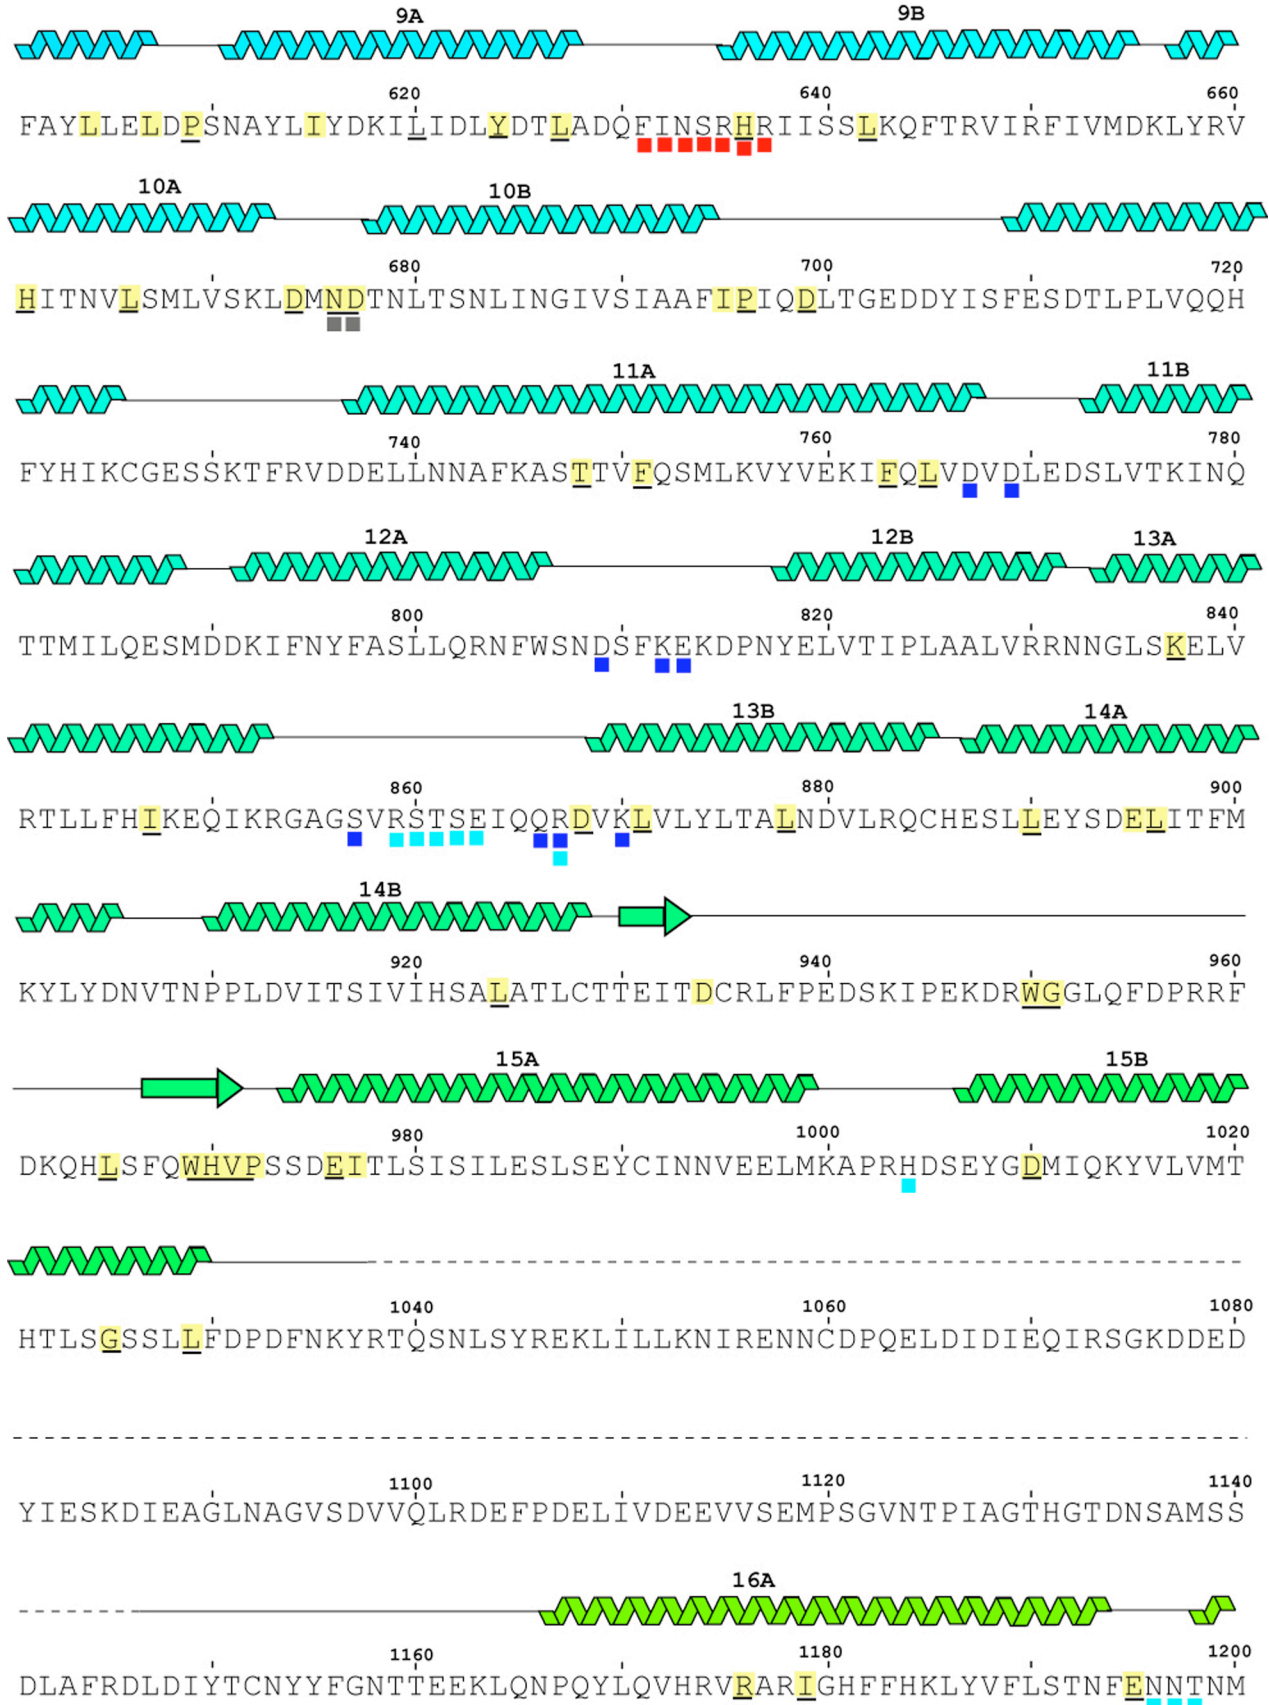



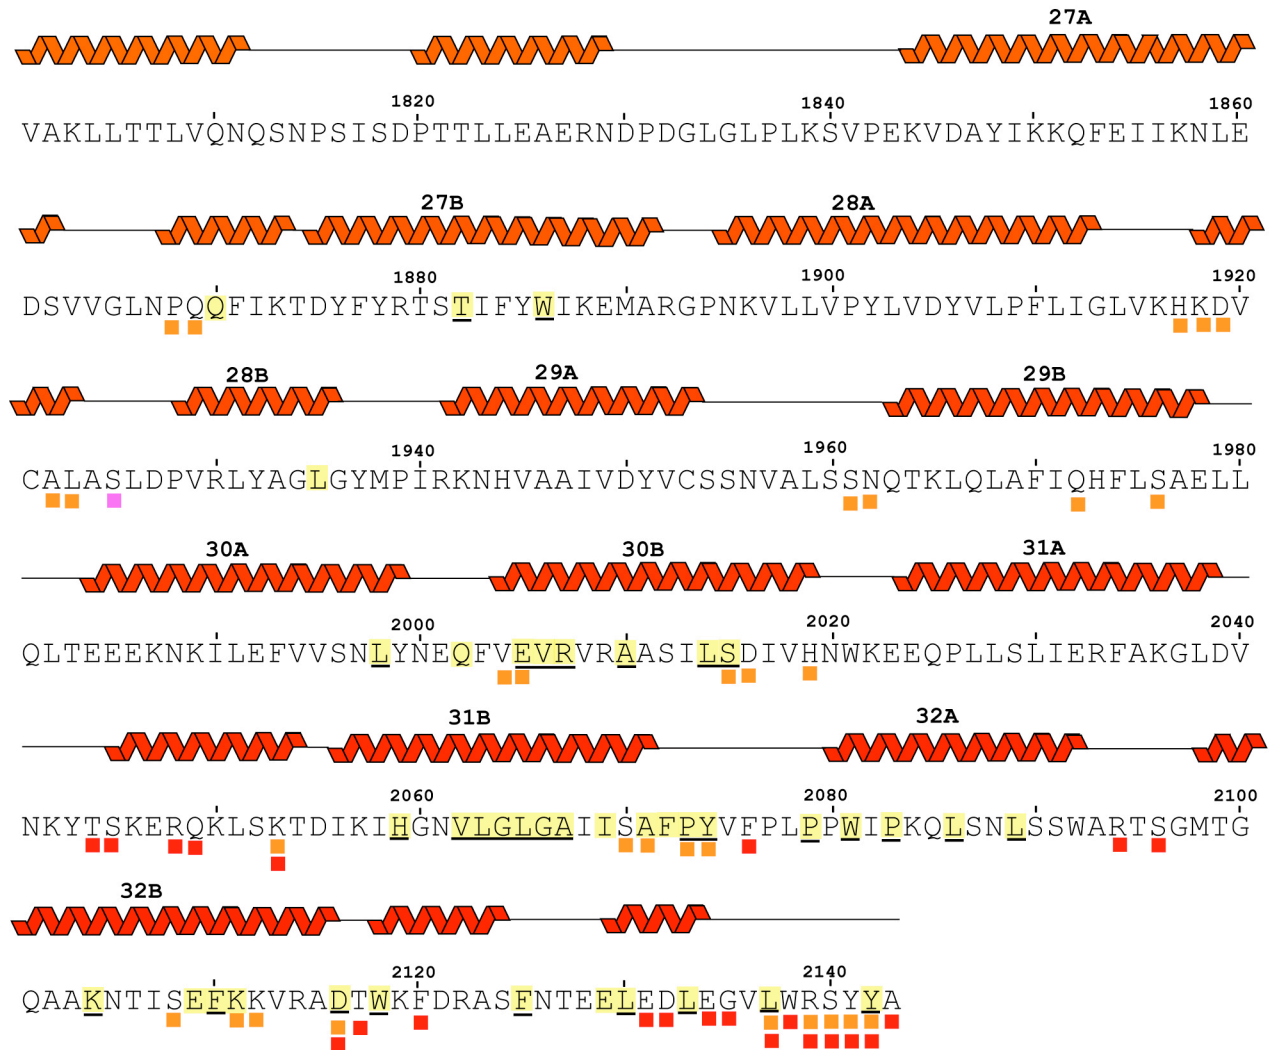



The 46 sequences used in the alignment to define conserved residues:

gi|37362646|ref|NP\_116648.2| [*Saccharomyces cerevisiae*]  
 gi|156844582|ref|XP\_001645353.1| [*Vanderwaltozyma polyspora*]  
 gi|50287269|ref|XP\_446064.1| [*Candida glabrata*]  
 gi|45201074|ref|NP\_986644.1| [*Ashbya gossypii* ]  
 gi|50308975|ref|XP\_454493.1|[*Kluyveromyces lactis*]  
 gi|50426149|ref|XP\_461671.1| [*Debaryomyces hansenii*]  
 gi|150865341|ref|XP\_001384517.2|[*Pichia stipitis*]  
 gi|68479947|ref|XP\_716023.1| [*Candida albicans*]  
 gi|149239843|ref|XP\_001525797.1|[*Lodderomyces elongisporus*]  
 gi|190348667|gb|EDK41164.2| [*Pichia guilliermondii*]  
 gi|50551363|ref|XP\_503155.1|[*Yarrowia lipolytica*]  
 gi|67538874|ref|XP\_663211.1|[*Aspergillus nidulans*]  
 gi|145257943|ref|XP\_001401896.1| [*Aspergillus niger*]  
 gi|164425515|ref|XP\_960116.2|[*Neurospora crassa* OR74A]  
 gi|171682604|ref|XP\_001906245.1|[*Podospora anserina*]  
 gi|46124079|ref|XP\_386593.1|[*Gibberella zeae*]  
 gi|154287488|ref|XP\_001544539.1|[*Ajellomyces capsulatus*]  
 gi|154312206|ref|XP\_001555431.1|[*Botryotinia fuckeliana*]  
 gi|156064295|ref|XP\_001598069.1| [*Sclerotinia sclerotiorum*]  
 gi|169606348|ref|XP\_001796594.1|[*Phaeosphaeria nodorum*]  
 gi|145607561|ref|XP\_361868.2|[*Magnaporthe grisea* ]  
 gi|119194335|ref|XP\_001247771.1|[*Coccidioides immitis*]  
 gi|121707973|ref|XP\_001271992.1|[*Aspergillus clavatus*]  
 gi|115391253|ref|XP\_001213131.1|[*Aspergillus terreus*]  
 gi|119500344|ref|XP\_001266929.1|[*Neosartorya fischeri*]  
 gi|169771439|ref|XP\_001820189.1|[*Aspergillus oryzae*]  
 gi|70993706|ref|XP\_751700.1|[*Aspergillus fumigatus*]  
 gi|189193275|ref|XP\_001932976.1| [*Pyrenophora tritici-repentis*]  
 gi|170086077|ref|XP\_001874262.1| [*Laccaria bicolor* S238N-H82]  
 gi|170084821|ref|XP\_001873634.1| [*Laccaria bicolor* S238N-H82]  
 gi|195997553|ref|XP\_002108645.1| [*Trichoplax adhaerens*]  
 gi|149449017|ref|XP\_001517136.1| [*Ornithorhynchus anatinus*]  
 gi|126304432|ref|XP\_001382168.1| [*Monodelphis domestica*]  
 gi|189524182|ref|XP\_001333755.2| [*Danio rerio*]  
 gi|73970154|ref|XP\_531823.2| [*Canis familiaris*]  
 gi|194220729|ref|XP\_001497130.2| [*Equus caballus*]  
 gi|119903486|ref|XP\_606554.3| [*Bos taurus*]  
 gi|163644283|ref|NP\_055429.2| [*Homo sapiens*]  
 gi|66801317|ref|XP\_629584.1| [*Dictyostelium discoideum* AX4]  
 gi|147906041|ref|NP\_001084866.1| [*Xenopus laevis*]  
 gi|158290777|ref|XP\_312339.4| [*Anopheles gambiae* str. PEST]  
 gi|91083491|ref|XP\_972018.1| [*Tribolium castaneum*]  
 gi|149044860|gb|EDL98046.1| [*Rattus norvegicus*]  
 gi|117956381|ref|NP\_598774.2| [*Mus musculus*]  
 gi|170055259|ref|XP\_001863503.1| [*Culex pipiens quinquefasciatus*]  
 gi|157110835|ref|XP\_001651267.1| [*Aedes aegypti*]

**Figure S2, related to Figure 2B**

This is the same as Figure 2B but also includes the closed conformation. Proteasome as seen in: Blm10 complex, white; PA26 complex (pdb 1z7q), yellow; unliganded proteasome (pdb 1ryp), cyan. Residues of the unliganded proteasome and proteasome in the Blm10 complex are labeled if they adopt conformations that are substantially different from that seen in the fully open conformation of the PA26 complex. N-terminal residues are disordered for  $\alpha 2$ ,  $\alpha 3$ , and  $\alpha 4$  in the Blm10 complex.

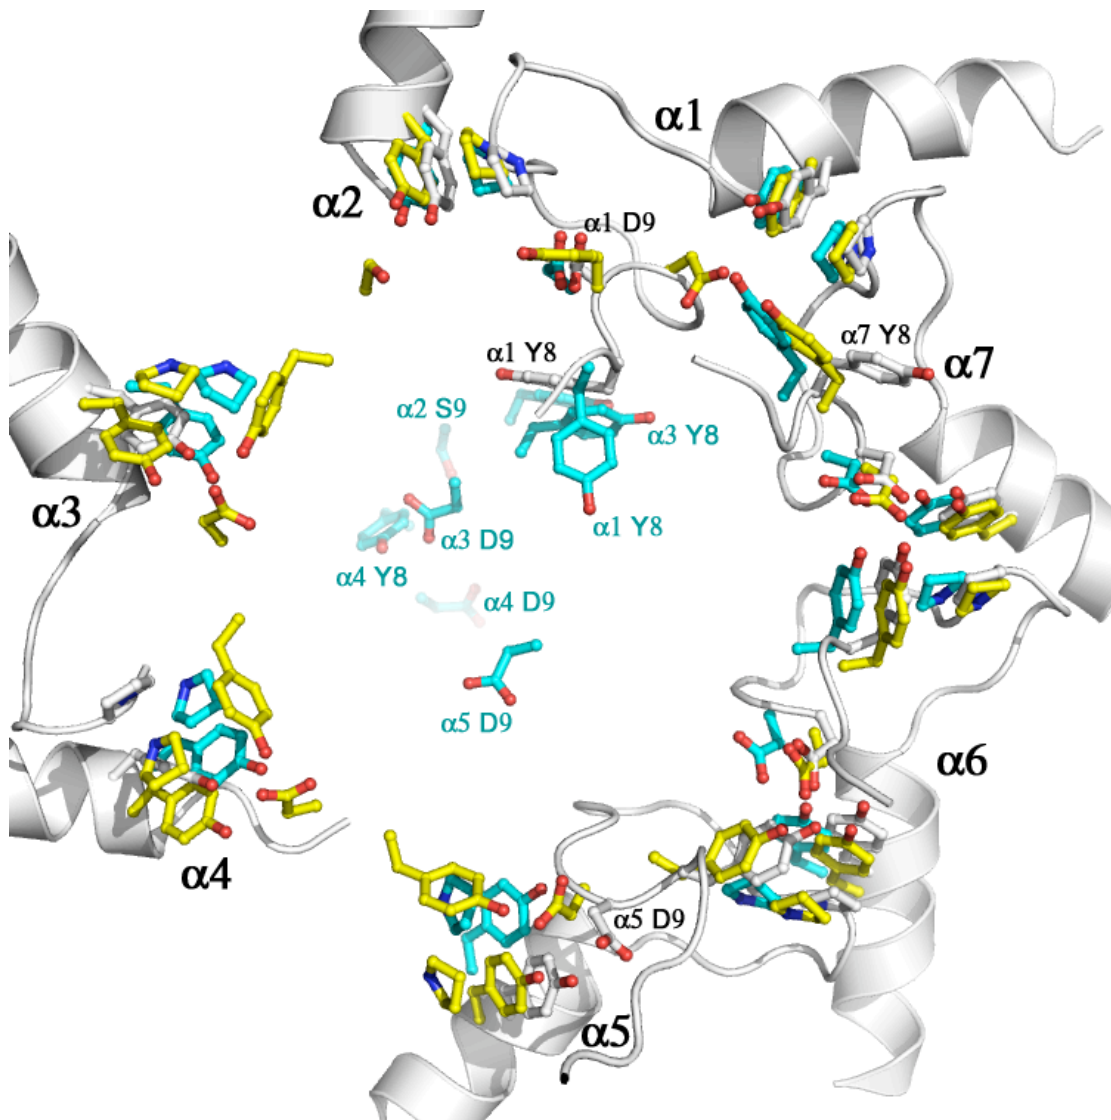

Figure S3, related to Figure 4

## (A) Blm10 functions in a proteasome-dependent process

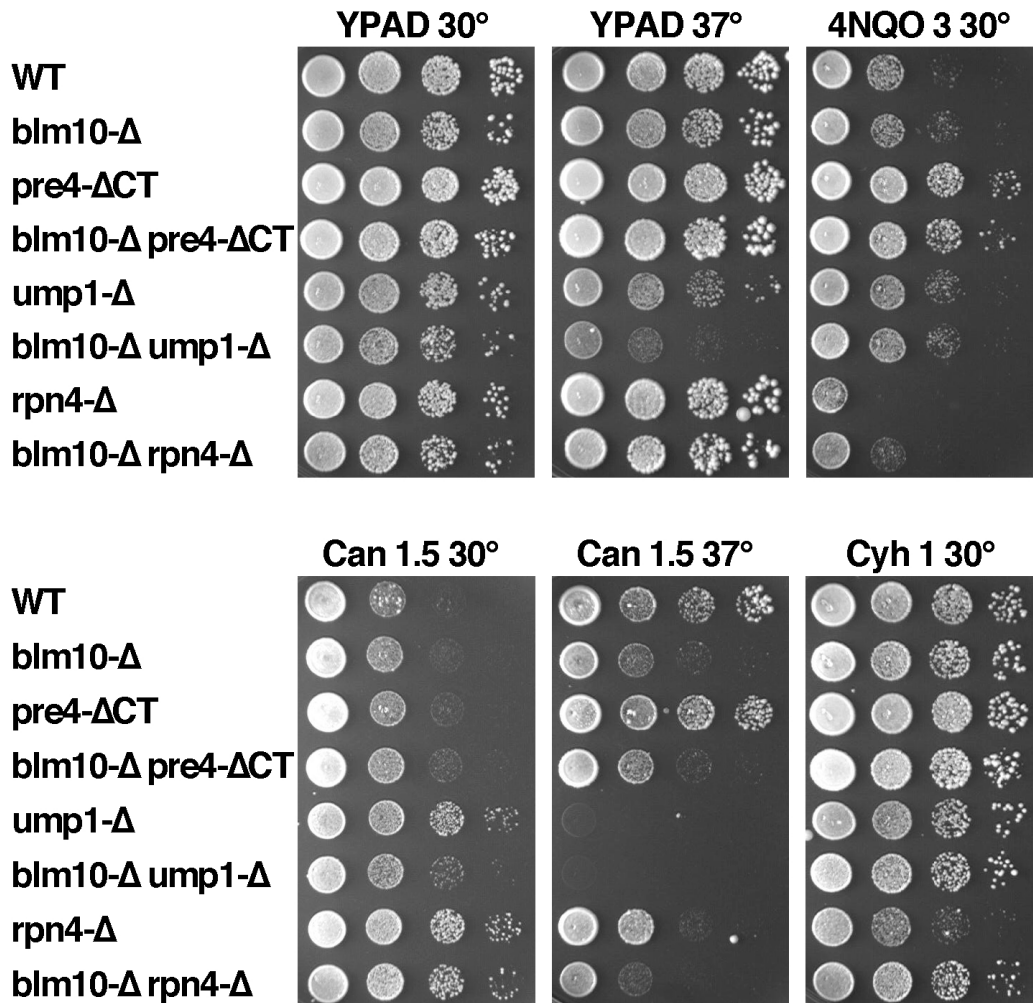

In our experiments using several strain backgrounds, loss of Blm10 did not cause significant sensitivity to any of a number of DNA damaging agents (Iwanczyk et al., 2006). Published reports indicated a role for Blm10 in the assembly or maintenance of 20S proteasomes (Fehlker et al., 2003; Marques et al., 2007), so we tested *blm10-Δ* mutants for defects associated with proteasome deficiency. Strains in the A364a background were grown to saturation in rich medium, then aliquots of 10-fold dilutions were placed on the media indicated and incubated at the temperature indicated in each panel. YPAD is rich medium, 4NQO 3 is YPAD with 3  $\mu\text{g/ml}$  4-nitroquinoline 1-oxide, Can 1.5 is synthetic medium lacking arginine and containing 1.5  $\mu\text{g/ml}$  canavanine, and Cyh 1 is YPAD with 1  $\mu\text{g/ml}$  cycloheximide.

Elevated temperatures or inclusion of the arginine analog canavanine can stress the proteolytic system in yeast by increasing the level of unfolded or aberrantly formed proteins. For example, loss of the 20S assembly chaperone Ump1 caused slow growth at 37° (row 5, YPAD 37°). While neither elevated temperature nor canavanine alone caused a noticeable defect in growth for a *blm10-Δ* mutant, growth on a low level of canavanine at 37° was significantly impaired (compare *blm10-Δ* with WT on the 1.5 μg/ml canavanine plate incubated at 37°). Further, combining both *blm10-Δ* and *ump1-Δ* deletions caused an enhanced growth defect relative to the *ump1-Δ* strain on YPAD at 37°. These observations demonstrate that cells lacking Blm10 have impaired ability to respond to proteolytic stress, possibly due to inadequate proteasome assembly.

It was recently reported that combining *blm10-Δ* with a deletion of the C-terminal 19 residues of the 20S subunit Pre4 (β7) caused strong temperature sensitivity (Marques et al., 2007). We have been unable to reproduce this result using strains in the A364a background, as single and double mutants each grew at equivalent rates at 37° (rows 3 and 4 in the figure) or at 38° (not shown), the maximal permissive temperature for this strain background. To determine whether this difference is due to the different strain backgrounds used, we obtained the strains used by Marques et al. (2007) in the JD47-13c background. After switching the mating type of one strain we performed a genetic cross to generate double *blm10-Δ pre4-ΔCT* mutants by segregation, instead of the procedure described previously that involved sequential integration of mutations (Marques et al., 2007). Once again, none of the double mutants isolated from the cross displayed temperature sensitivity. Because the *pre4-ΔCT* allele used by Marques et al. was not marked, we scored it using a PCR test and verified a subset of the results by DNA sequencing. To further confirm this result, we introduced a similar *pre4-ΔCT* mutation into JD47-13c but this time with the *URA3* gene inserted adjacent to the deletion. This allowed a much larger number of double mutant *blm10-Δ pre4-ΔCT* segregants to be identified and tested, but all of these also proved to be temperature resistant. We were therefore unable to observe a synthetic growth defect or temperature sensitivity for *blm10-Δ pre4-ΔCT* combinations in either of two genetic strain backgrounds. The *pre4-ΔCT* strains we constructed in the A364a background do display resistance to 4-nitroquinoline 1-oxide, a phenotype associated with several proteasome assembly defects (Le Tallec et al., 2007), consistent with suboptimal proteasome formation. However, this phenotype is also unaffected by loss of Blm10 (compare rows 3 and 4).

While the results above are consistent with a role for Blm10 in promoting proteasome function, note that genetic analysis of proteasomal assembly and function pathways can be difficult to interpret. For example, Ump1 is needed for normal growth during the proteolytic stress associated with elevated temperature as revealed by weak growth at 37°, but an *ump1-Δ* mutant was more resistant than a WT strain to a different proteolytic stress, the presence of a low level of canavanine (compare rows 1 and 5 in the canavanine 1.5 at 30° panel). Rpn4 is a transcription factor that upregulates proteasome gene expression under conditions of proteolytic stress (Mannhaupt et al., 1999; Xie and Varshavsky, 2001), but an *rpn4-Δ* mutant grows normally at 37°, is sensitive to 4NQO, and in our tests is more resistant than WT to canavanine at 30° but more sensitive than WT to canavanine at 37°. Unlike the *pre4-ΔCT* or *ump1-Δ* strains, the *rpn4-Δ* mutant is sensitive to the protein synthesis inhibitor cycloheximide (Cyh). Loss of Blm10 suppressed this defect and the 4NQO sensitivity, but enhanced the defect in growth observed for the *rpn4-Δ* strain on canavanine at 37°. Schmidt et al. (2005) found that *rpn4-Δ* caused slight sensitivity to canavanine and that *rpn4-Δ blm10-Δ* double mutants had a slight synthetic growth defect both on rich medium and on canavanine. These results differ from ours, possibly due to strain background differences. Alternatively, as we have found that *blm10-Δ* mutants lose mitochondrial function at a high frequency, perhaps some of the variation among different experiments can be accounted for by clonal variation. That is, different cultures will have different retention of mitochondrial function due to the stochastic nature of the loss, contributing to phenotypic variation among cultures in a given assay even when comparing different clones of the same strain.

Together these results are consistent with a role for Blm10 in a proteasome-dependent process, but they illustrate the difficulty of interpreting genetic effects when examining a factor like the proteasome that directly or indirectly alters many facets of a broad range of physiologically important processes.

**(B). Loss of *BLM10* has minor effects on ROS formation and mitochondrial genome mutation**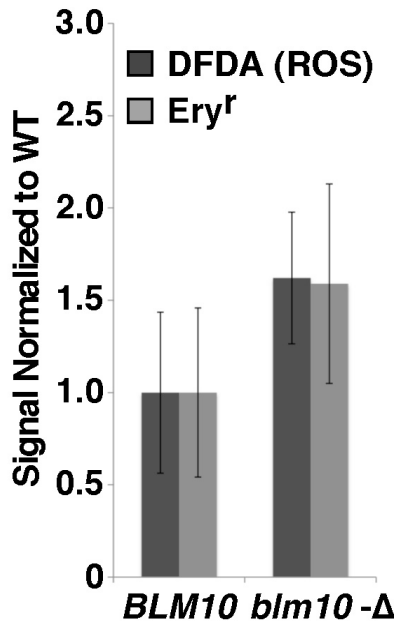

Isogenic strains with or without *BLM10* (8127-7-4, 8634-9-1) were grown to log phase in rich medium and then tested for production of reactive oxygen species (ROS) or mutation of the mitochondrial genome as detected by production of erythromycin resistant clones, essentially as described (Malc et al., 2009). Briefly, for the ROS assay, cells were collected by centrifugation, washed, then multiple aliquots were suspended in a solution containing 10  $\mu$ M 2', 7'-Dichlorofluorescein diacetate (Sigma, DFDA). After incubating 30 minutes at 30° the cells were washed again, suspended in detergent and lysed by agitation with glass beads. The fluorescence of the supernatant was then tested at 520 nm with excitation at 485 nm. Signal in this assay depends on the intracellular level of ROS (Doudican et al., 2005). Dilutions of the same cultures were plated on rich medium with glycerol as the sole carbon source and containing 4 mg/ml of erythromycin. The yield of erythromycin resistant clones was then determined as an indication of the frequency of mutation of the mitochondrial rDNA locus, which determines sensitivity to this antibiotic. Three independent cultures were tested in each assay, normalized to the value obtained for the WT samples, and the average and standard deviation presented here. The average values for the WT were 1.4 fluorescence units/A660 value, and 24 erythromycin resistant colonies per 10<sup>7</sup> viable cells on glycerol medium lacking the drug. Loss of *BLM10* in this and other assays consistently caused slightly higher levels of ROS production and mitochondrial genome mutation, but the effect is small and not statistically significant in any single assay.

**(C) Western blot showing the stability of Blm10-CT $\Delta$ 3**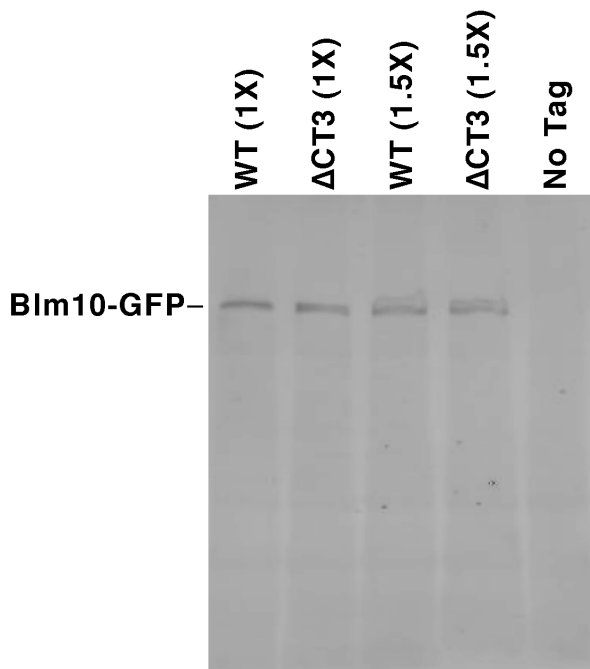

Strains 8670-1134 (WT Blm10 with GFP inserted after residue 1134), 8675-1134 (the same but with the last three residues of the Blm10 ORF deleted), and a related strain without a GFP tag were grown to log phase, treated with trichloroacetic acid, and processed for SDS-PAGE and western blotting as described (VanDemark et al., 2008). GFP was detected with a monoclonal antibody against this protein. The band indicated is the full-length fusion protein. This shows that neither deletion of the last three residues of Blm10 nor insertion of the *URA3* gene downstream of the Blm10 ORF cause detectable changes in the level of Blm10 protein. (Hua Xin, personal communication).

**Table S1. Strains used, related to Figure 4**

Strains were constructed using standard methods. JD47-13c and AM36 were obtained from J. Dohman (Marques et al., 2007). The final 3 residues of Blm10 were deleted by transforming with a PCR product generated using pRS406 (Brachmann et al., 1998; Longtine et al., 1998) as the template and an oligonucleotide that replaces the first tyrosine in the C-terminal ...YYA sequence with a stop codon followed by the normal 30 bp of genomic sequence found downstream of the *BLM10* gene. This inserts the URA3 gene 30 bp downstream of a C-terminally deleted allele in an otherwise normal genomic context, as confirmed by sequencing. Similar strategies were used to mark WT *BLM10* in the same position, to delete the final residue of the ORF, and to mutate the final YYA sequence to AAA.



| Strain                      | Used in   | Mating type | Genotype                                                                      |
|-----------------------------|-----------|-------------|-------------------------------------------------------------------------------|
| A364a genetic background:   |           |             |                                                                               |
| 2268-1-1                    | Fig 5     | <i>MATa</i> | <i>ura3-Δ0 leu2-Δ0 trp1-Δ2 his7 blm10-Δ(::LEU2)</i>                           |
| 7860-6-4                    | Fig 5     | <i>MATa</i> | <i>ura3-Δ0 leu2-Δ0 trp1-Δ2 his7</i>                                           |
| 8015-4-1                    | Fig 5     | <i>MATa</i> | <i>ura3-Δ0 leu2-Δ0 trp1-Δ2 his7 blm10-Δ(::TRP1)</i>                           |
| 8127-5-1                    | Fig 5     | <i>MATa</i> | <i>ura3-Δ0 leu2-Δ0 trp1-Δ2 his7 lys2-128Δ</i>                                 |
| 8127-5-2                    | Fig S2    | <i>MATa</i> | <i>ura3-Δ0 leu2-Δ0 trp1-Δ2 his3 lys2-128Δ</i>                                 |
| 8127-7-4                    | Fig 5, S4 | <i>MATa</i> | <i>ura3-Δ0 leu2-Δ0 trp1-Δ2 his3 lys2-128Δ</i>                                 |
| 8130-1                      | Fig 5     | <i>MATa</i> | <i>ura3-Δ0 leu2-Δ0 trp1-Δ2 his7 blm10-Δ(::KanMX)</i>                          |
| 8151-1-1                    | Fig 5     | <i>MATa</i> | <i>ura3-Δ0 leu2-Δ0 trp1-Δ2 his7 lys2-128Δ</i>                                 |
| 8386-7-2                    | Fig 5     | <i>MATa</i> | <i>ura3-Δ0 leu2-Δ0 trp1-Δ2 his7 lys2-128Δ</i>                                 |
| 8571-2-1                    | Fig S2    | <i>MATa</i> | <i>ura3-Δ0 leu2-Δ0 trp1-Δ2 his3 lys2-128Δ pre4-CTΔ19(URA3)</i>                |
| 8574-1-3                    | Fig S2    | <i>MATa</i> | <i>ura3-Δ0 leu2-Δ0 trp1-Δ2 his3 lys2-128Δ rpn4-Δ(::KanMX)</i>                 |
| 8577-6-1                    | Fig 5     | <i>MATa</i> | <i>ura3-Δ0 leu2-Δ0 trp1-Δ2 his7 lys2-128Δ blm10-Δ(::LEU2)</i>                 |
| 8578-2-4                    | Fig S2    | <i>MATa</i> | <i>ura3-Δ0 leu2-Δ0 trp1-Δ2 his3 lys2-128Δ blm10-Δ(::LEU2) rpn4-Δ(::KanMX)</i> |
| 8578-7-1                    | Fig S2    | <i>MATa</i> | <i>ura3-Δ0 leu2-Δ0 trp1-Δ2 his3 lys2-128Δ blm10-Δ(::LEU2)</i>                 |
| 8579-6-3                    | Fig 5     | <i>MATa</i> | <i>ura3-Δ0 leu2-Δ0 trp1-Δ2 his7 lys2-128Δ blm10-Δ(::LEU2)</i>                 |
| 8583-2-1                    | Fig S2    | <i>MATa</i> | <i>ura3-Δ0 leu2-Δ0 trp1-Δ2 his3 lys2-128Δ blm10-Δ(::LEU2) pre4-CTΔ19(UR</i>   |
| 8628-1-1                    | Fig 5     | <i>MATa</i> | <i>ura3 leu2 trp1 his3 lys2-128Δ blm10-CTΔ3(URA3)</i>                         |
| 8634-9-1                    | Fig 5, S4 | <i>MATa</i> | <i>ura3-Δ0 leu2-Δ0 trp1-Δ2 his3 lys2-128Δ blm10-Δ(::LEU2)</i>                 |
| 8647-9-2                    | Fig 5     | <i>MATa</i> | <i>ura3 leu2 trp1 his7 lys2-128Δ blm10-Δ(::KanMX)</i>                         |
| 8664-1-3                    | Fig 5     | <i>MATa</i> | <i>ura3 leu2 trp1 his7 lys2-128Δ blm10-CTΔ3(URA3)</i>                         |
| 8685                        | Fig 5     | <i>MATa</i> | <i>ura3-Δ0 leu2-Δ0 trp1-Δ2 his7 lys2-128Δ blm10-YYA2141-2143AAA(URA3)</i>     |
| 8670-1134                   | Fig S5    | <i>MATa</i> | <i>ura3-Δ0 leu2-Δ0 trp1-Δ2 his7 lys2-128Δ BLM10(1134-GFP)</i>                 |
| 8675-1134                   | Fig S5    | <i>MATa</i> | <i>ura3-Δ0 leu2-Δ0 trp1-Δ2 his7 lys2-128Δ blm10-ΔCT3(1134-GFP, URA3)</i>      |
| 8688                        | Fig 5     | <i>MATa</i> | <i>ura3-Δ0 leu2-Δ0 trp1-Δ2 his7 lys2-128Δ blm10-*2144A(URA3)</i>              |
| 8689                        | Fig 5     | <i>MATa</i> | <i>ura3-Δ0 leu2-Δ0 trp1-Δ2 his7 lys2-128Δ blm10-CTΔ1(URA3)</i>                |
| 8690                        | Fig 5     | <i>MATa</i> | <i>ura3-Δ0 leu2-Δ0 trp1-Δ2 his7 lys2-128Δ BLM10(URA3)</i>                     |
| S288c genetic background    |           |             |                                                                               |
| 8266-7-5a                   | Fig 5     | <i>MATa</i> | <i>leu2-Δ1 trp1-Δ63 ura3-52 his4-912Δ lys2-128Δ</i>                           |
| 8358-T1                     | Fig 5     | <i>MATa</i> | <i>leu2-Δ1 trp1-Δ63 ura3-52 his4-912Δ lys2-128Δ blm10-Δ(::TRP1)</i>           |
| W303 genetic background     |           |             |                                                                               |
| 8025-2-3                    | Fig 5     | <i>MATa</i> | <i>ade2 can1 his3 ura3 leu2 trp1 adh4:URA3</i>                                |
| 8132                        | Fig 5     | <i>MATa</i> | <i>ade2 can1 his3 ura3 leu2 trp1 adh4:URA3 blm10-Δ(::TRP1)</i>                |
| JD47-13c genetic background |           |             |                                                                               |
| JD47-13c                    | Fig 5     | <i>MATa</i> | <i>his3-Δ200 leu2-3,112 lys2-801 trp1-Δ63 ura3-52</i>                         |
| AM36                        | Fig 5     | <i>MATa</i> | <i>his3-Δ200 leu2-3,112 lys2-801 trp1-Δ63 ura3-52 blm10-Δ(::KanMX4)</i>       |

## Supplementary Experimental Procedures

### Protein Preparation

Double capped *S. cerevisiae* proteasome:Blm10 and proteasome: $\Delta$ 50Blm10 complexes were prepared largely as described (Iwanczyk et al., 2006). Briefly, *S. cerevisiae* strain SDL135 expressing proteasome subunit Pre1/ $\beta$ 4 tagged with protein A at the C-terminus (Leggett et al., 2002) (kind gift of Daniel Finley and David Leggett) was grown in a 36 L fermentor in YPD+glucose at 30°C for 2 days to saturation, and harvested by centrifugation. Polyhistidine-tagged Blm10 was expressed from pTF155/pCPH1327 (full length) or pCPH1328 ( $\Delta$ 50) in a 36L fermentor or shaker flasks in synthetic medium with raffinose to an OD<sup>600</sup> of 0.7 at 30°C, whereupon expression was induced by the addition of galactose to 1.1% and the culture grown overnight and harvested by centrifugation. Cell lysis was performed under liquid nitrogen using a freezer mill 6850 pulverizer (SPEX CentriPrep Group). Subsequent steps were performed at 4°C. Typical preparations started with 80g of cell paste expressing tagged proteasome and 80g of cell paste expressing Blm10, and followed the published protocol (Iwanczyk et al., 2006) to give a typical yield of 2-4 mg of complex. Protein was concentrated to 20-25 mg/ml in 50mM Tris pH 7.5, 50mM NaCl, 1mM EDTA, and 0.5mM dithiothreitol (DTT) using a spin filtration device. The concentrated protein was buffer exchanged in the same solution with fresh DTT using a G50-sephadex spin column.

### Crystallization

Immediately prior to setting up crystallization trials, the protein sample was centrifuged at 16,000 g at 4°C for 10 minutes. Blm10:proteasome complex crystals were grown by vapor diffusion in drops comprising 0.5 $\mu$ L protein and 0.5 $\mu$ L reservoir against a reservoir of 5-6% PEG 8k, 0.1M Na/K phosphate pH 6.2, 0.2M NaCl, and 18-30% of ethylene glycol. Crystals were harvested by addition of ~50  $\mu$ L of well solution to the drop immediately prior to suspending the crystal in a nylon loop and plunging into liquid nitrogen. Crystals with full-length Blm10 and Blm10 missing the first 50 amino acid residues (Blm10 $\Delta$ 50) grew under the same conditions and generally had similar morphologies, although the Blm10 $\Delta$ 50 complex crystals grew more reproducibly in about 2-3 weeks and diffracted more strongly. Growth of full-length Blm10 complex crystals took from weeks to months and was highly non-reproducible, with the large majority of preparations not yielding usable crystals. Both of the constructs had N-terminal extensions of 12 histidine residues, and started with the sequence H<sub>12</sub>-G-

T<sup>2</sup> or H<sub>12</sub>-GT-D<sup>51</sup>. The polyhistidine tags were not removed prior to setting up crystallization trials. The full-length Blm10:proteasome crystals were poorly isomorphous and showed large variation in cell dimensions and even in space group.

### Structure Determination

Diffraction data were collected at the National Synchrotron Light Source beamline X29 and processed using HKL (Otwinowski and Minor, 1997). Data were collected from the various crystals (Table 1) at 100K and at the wavelength indicated: c158 1.1 Å; c164 1.0 Å; c172 1.0688 Å; c280 1.0809 Å; c290 1.0 Å; c292 1.0642 Å. Many of the crystallographic calculations were performed using programs of the CCP4 suite (Collaborative Computational Project, 1994). The various crystal forms were phased by molecular replacement with PHASER (McCoy et al., 2007) using the unliganded structure of the *S. cerevisiae* proteasome (Groll et al., 1997) (pdb code 1ryp) as the search model. Map quality was greatly improved by non-crystallographic symmetry (NCS) averaging over the multiple copies of half proteasome:Blm10 complexes in the asymmetric unit and averaging between different crystal forms using DMMULTI (Cowtan, 1994). Map quality was further improved by application of a -50 Å<sup>2</sup> sharpening factor. Crystals belonging to space group P2<sub>1</sub> had four-fold NCS, and crystals belonging to space group P2<sub>1</sub>2<sub>1</sub>2<sub>1</sub> had two-fold NCS.

Model building with O (Jones et al., 1991) was aided by the identification of 20 methionine and 14 cysteine sites from crystals soaked in thimerosal, methyl mercury nitrate, or potassium platinum tetrachloride. Heavy atom derivatives were prepared by adding aqueous stock solutions to the crystallization well solution to make the concentration indicated, followed by addition of 40 µL of this solution directly to the crystallization drop for the time indicated prior to mounting and plunging into liquid nitrogen: c164/FL-Thim, thimerosal, 6mM, 2 hours; c172/FL- PtCl<sub>4</sub>, 6 mM, 2 hours; c290/Δ50-MeHg, MeHgNO<sub>2</sub>, 1 mM, 10 minutes; c292/Δ50-PtCl<sub>4</sub>, K<sub>2</sub>PtCl<sub>4</sub> 2mM, 24 hours. Due to non-isomorphism, the heavy atom derivative structures were determined individually by molecular replacement and their phases refined by NCS averaging. Anomalous difference Fourier maps were found to be more sensitive than isomorphous difference maps for the location of heavy atoms.

The best diffracting crystal structure was refined with REFMAC5 (Murshudov et al., 1997) and rebuilt with KiNG (Davis et al., 2007), with the final refinement calculations performed using Phenix (Adams

et al., 2002). All measured reflections (except the test set) were used in refinement, regardless of  $I/\sigma(I)$  value, up to a Bragg spacing of 3.0 Å, at which point the  $\sigma_A$  value falls precipitously (DeLaBarre and Brunger, 2006). No solvent molecules were included in the model. NCS restraints were set automatically in Phenix and only minor deviations from NCS are apparent. Stereochemistry was assessed using MolProbity (Davis et al., 2007), and the overall clashscore was 70% for the Blm10 portion of the structure in comparison with other structures reported at 3.4 Å resolution. The clashscore was 89% for the proteasome portion of the structure. Molprobity evaluated 87.8% of residues as possessing favored Ramachandran angles and 2.8% as being outliers. The following residues lacked defined density and have been omitted from the model. Blm10: N-terminus to Ser78, Asp155-Ala238, Arg1038-Asp1146. Proteasome:  $\alpha$ 1 before Ala10,  $\alpha$ 2 before Gln20,  $\alpha$ 3 before Ser14,  $\alpha$ 4 before Ile17,  $\alpha$ 7 before Gly4. All other proteasome residues that were present in the search model were also included in the Blm10 complex refinement. Crystallographic statistics are given in Table 1. The figures were made with PyMol (DeLano, 2002).

## Supplementary References

- Adams, P.D., Grosse-Kunstleve, R.W., Hung, L.W., Ioerger, T.R., McCoy, A.J., Moriarty, N.W., Read, R.J., Sacchettini, J.C., Sauter, N.K., and Terwilliger, T.C. (2002). PHENIX: building new software for automated crystallographic structure determination. *Acta Crystallogr D Biol Crystallogr* *58*, 1948-1954.
- Brachmann, C.B., Davies, A., Cost, G.J., Caputo, E., Li, J., Hieter, P., and Boeke, J.D. (1998). Designer deletion strains derived from *Saccharomyces cerevisiae* S288C: a useful set of strains and plasmids for PCR-mediated gene disruption and other applications. *Yeast* *14*, 115-132.
- Collaborative Computational Project, N. (1994). The CCP4 suite: programs for protein crystallography. *Acta Crystallogr D Biol Crystallogr* *50*, 760-763.
- Cowtan, K.D. (1994). 'dm': An automated procedure for phase improvement by density modification. Joint CCP4 and ESF-EACBM newsletter on protein crystallography *31*, 34-38.
- Davis, I.W., Leaver-Fay, A., Chen, V.B., Block, J.N., Kapral, G.J., Wang, X., Murray, L.W., Arendall, W.B., 3rd, Snoeyink, J., Richardson, J.S., *et al.* (2007). MolProbity: all-atom contacts and structure validation for proteins and nucleic acids. *Nucleic Acids Res* *35*, W375-383.
- DeLaBarre, B., and Brunger, A.T. (2006). Considerations for the refinement of low-resolution crystal structures. *Acta Crystallogr D Biol Crystallogr* *62*, 923-932.
- DeLano, W.L. (2002). The PyMOL Molecular Graphics System (DeLano Scientific, San Carlos, CA, USA.).
- Doudican, N.A., Song, B., Shadel, G.S., and Doetsch, P.W. (2005). Oxidative DNA damage causes mitochondrial genomic instability in *Saccharomyces cerevisiae*. *Mol Cell Biol* *25*, 5196-5204.
- Gouet, P., Courcelle, E., Stuart, D.I., and Metz, F. (1999). ESPript: analysis of multiple sequence alignments in PostScript. *Bioinformatics* *15*, 305-308.
- Jones, T.A., Zou, J.Y., Cowan, S.W., and Kjeldgaard, M. (1991). Improved methods for building protein models in electron density maps and the location of errors in these models. *Acta Crystallogr A* *47 (Pt 2)*, 110-119.
- Le Tallec, B., Barrault, M.B., Courbeyrette, R., Guerois, R., Marsolier-Kergoat, M.C., and Peyroche, A. (2007). 20S proteasome assembly is orchestrated by two distinct pairs of chaperones in yeast and in mammals. *Mol Cell* *27*, 660-674.
- Leggett, D.S., Hanna, J., Borodovsky, A., Crosas, B., Schmidt, M., Baker, R.T., Walz, T., Ploegh, H., and Finley, D. (2002). Multiple associated proteins regulate proteasome structure and function. *Mol Cell* *10*, 495-507.
- Longtine, M.S., McKenzie, A., 3rd, Demarini, D.J., Shah, N.G., Wach, A., Brachat, A., Philippsen, P., and Pringle, J.R. (1998). Additional modules for versatile and economical PCR-based gene deletion and modification in *Saccharomyces cerevisiae*. *Yeast* *14*, 953-961.
- Mannhaupt, G., Schnall, R., Karpov, V., Vetter, I., and Feldmann, H. (1999). Rpn4p acts as a transcription factor by binding to PACE, a nonamer box found upstream of 26S proteasomal and other genes in yeast. *FEBS Lett* *450*, 27-34.

McCoy, A.J., Grosse-Kunstleve, R.W., Adams, P.D., Winn, M.D., Storoni, L.C., and Read, R.J. (2007). Phaser crystallographic software. *J Appl Cryst* *40*, 658-674.

Murshudov, G.N., Vagin, A.A., and Dodson, E.J. (1997). Refinement of macromolecular structures by the maximum-likelihood method. *Acta Crystallogr D Biol Crystallogr* *53*, 240-255.

Ortega, J., Heymann, J.B., Kajava, A.V., Ustrell, V., Rechsteiner, M., and Steven, A.C. (2005). The axial channel of the 20S proteasome opens upon binding of the PA200 activator. *J Mol Biol* *346*, 1221-1227.

Otwinowski, Z., and Minor, W. (1997). Processing of X-ray diffraction data collected in oscillation mode. *Methods Enzymol* *276*, 307-326.

VanDemark, A.P., Xin, H., McCullough, L., Rawlins, R., Bentley, S., Heroux, A., Stillman, D.J., Hill, C.P., and Formosa, T. (2008). Structural and functional analysis of the Spt16p N-terminal domain reveals overlapping roles of yFACT subunits. *J Biol Chem* *283*, 5058-5068.

Xie, Y., and Varshavsky, A. (2001). RPN4 is a ligand, substrate, and transcriptional regulator of the 26S proteasome: a negative feedback circuit. *Proc Natl Acad Sci U S A* *98*, 3056-3061.
